# Supplementary material
Source: publisher figshare collection journal article supplement (https://acs.figshare.com/ndownloader/files/9149899)
Supplement: Supplementary file 1 [file 9149899]

## Supporting Information

### **Vibrational Sum-Frequency-Generation (SFG) Spectroscopy of Bulk Materials Consisting of SFG-Active Nanocrystals: Experimental and Theoretical Study of Azimuth Angle and Polarization Dependences of SFG Spectral Features of Uniaxially-Aligned Cellulose Crystals**

Xing Chen<sup>†§</sup>, Christopher M. Lee<sup>‡§</sup>, Hongfei Wang<sup>¶</sup>, Lasse Jensen<sup>†\*</sup>, and  
Seong H. Kim<sup>‡\*</sup>

<sup>†</sup> Department of Chemistry, The Pennsylvania State University, PA, 16802, USA

<sup>‡</sup> Department of Chemical Engineering and Materials Research Institute, The  
Pennsylvania State University, PA, 16802, USA

<sup>¶</sup> Department of Chemistry, Fudan University, 220 Handan Road, Yangpu District,  
Shanghai 200433, China

<sup>§</sup> Equally contributed to this work

<sup>\*</sup> Corresponding Authors: jensen@chem.psu.edu, shkim@engr.psu.edu

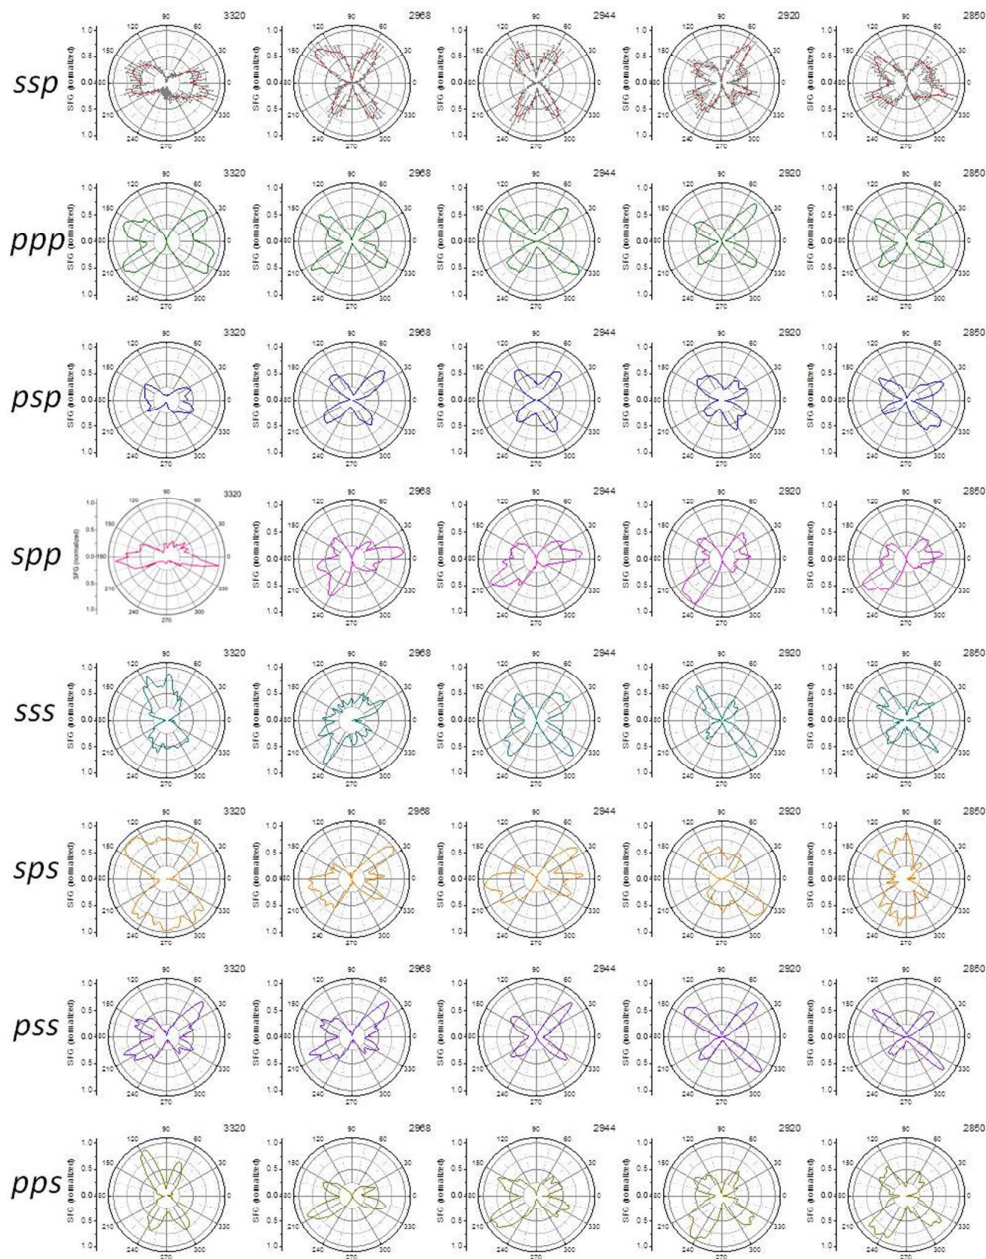

**Figure S1.** Full data set of the azimuth angle dependence for four SFG peaks in the CH/CH<sub>2</sub> stretch region (2850, 2920, 2944, and 2968  $\text{cm}^{-1}$ ) and one SFG peak with the maximum intensity in the OH stretch region (3320  $\text{cm}^{-1}$ ) measured using the ps-scanning system with eight different polarization combinations (*ssp*, *ppp*, *psp*, *spp*, *sss*, *sps*, *pss*, *pps*). The data shown here are the average of signals from multiple locations (4 – 6 spots).

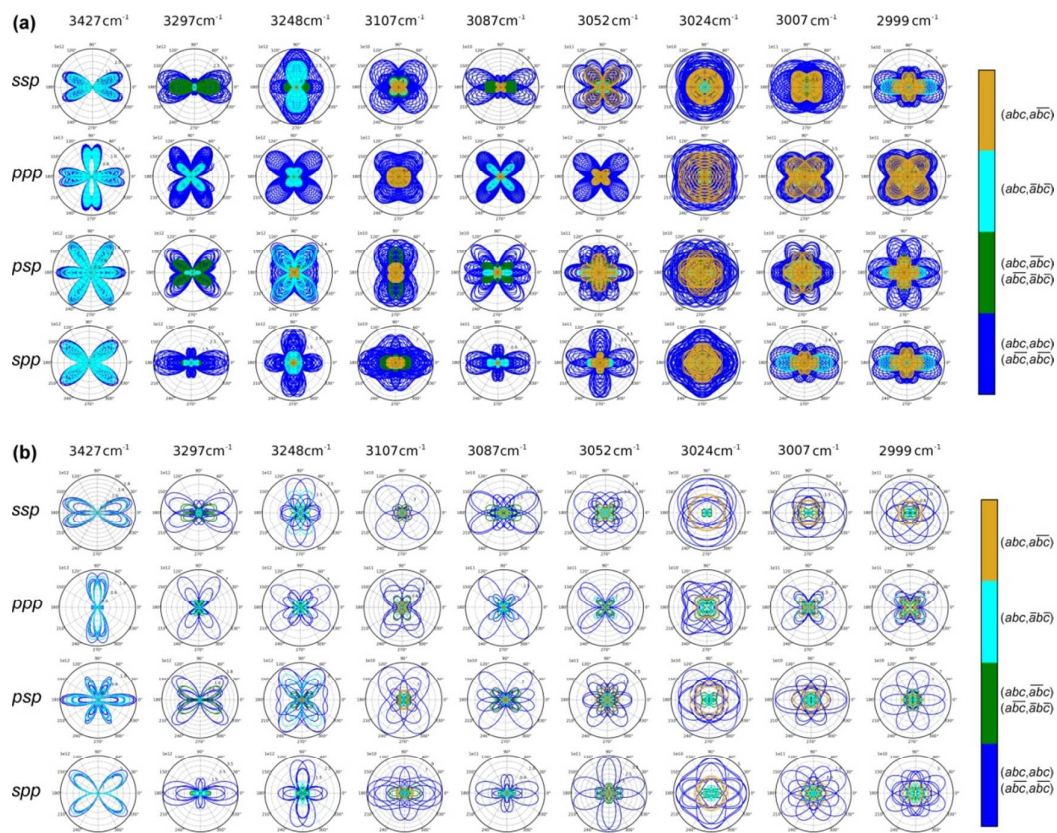

**Figure S2.** Full TD-DFT calculation results for the azimuth angle dependence of 6 CH/CH<sub>2</sub> modes (2999, 3007, 3024, 3052, 3087, 3107 cm<sup>-1</sup>) and 3 OH modes (3248, 3297, and 3427 cm<sup>-1</sup>) for 4 different polarization combinations (ssp, ppp, psp, spp). The random packing and preferential packing of crystallites with respect to the film surface are shown separately in (a) and (b), respectively. In each case, the data show the individual cases of 4 different crystallite packing within the SFG coherence length.

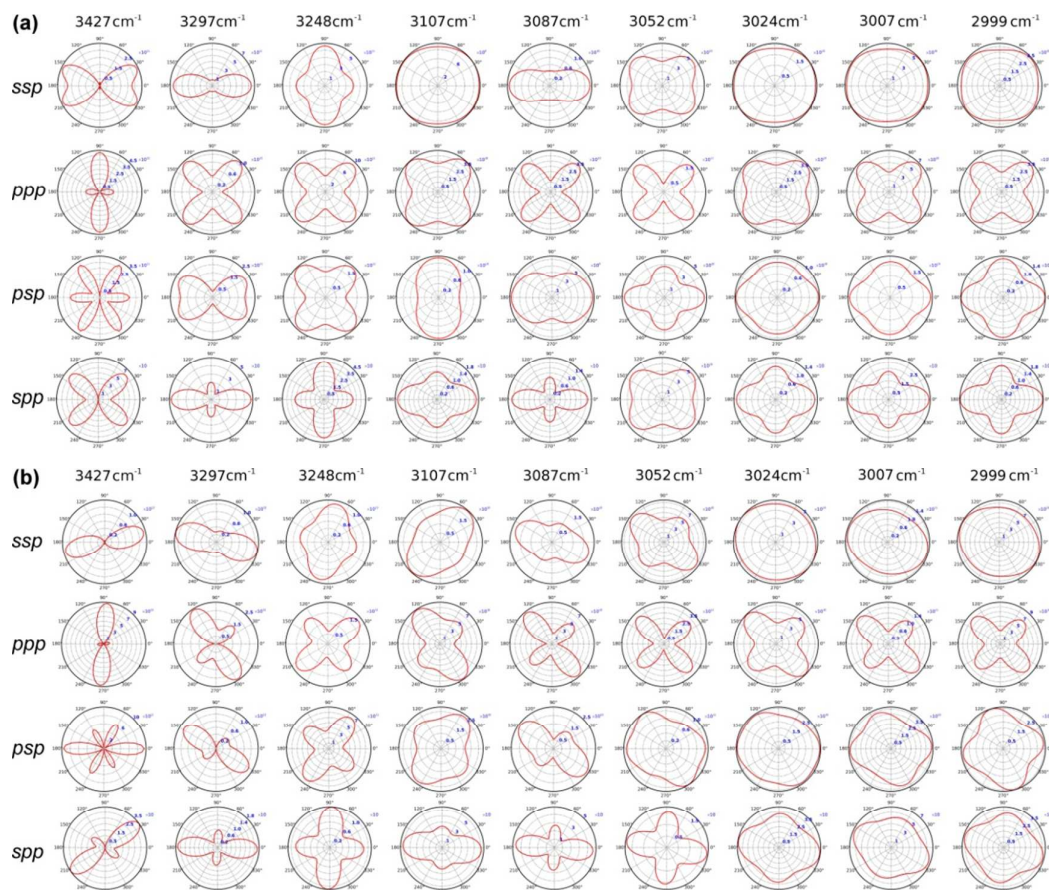

**Figure S3.** Full TD-DFT calculation results for the azimuth angle dependence of 6 CH/CH<sub>2</sub> modes (2999, 3007, 3024, 3052, 3087, 3107 cm<sup>-1</sup>) and 3 OH modes (3248, 3297, and 3427 cm<sup>-1</sup>) for 4 different polarization combinations (ssp, ppp, psp, spp). The averages for the random and preferential packing of crystallites with respect to the film surface are shown separately in (a) and (b), respectively.
